# Supplementary material
Source: PubMed Central journal article supplement (PMC6990795)
Supplement: jamaotolaryngolheadnecksurg-146-237-s001.pdf [file jamaotolaryngolheadnecksurg-146-237-s001.pdf]

## Supplementary Online Content

Liu RH, Razavi CR, Chang H-Y, et al. Association of hypocalcemia and magnesium disorders with thyroidectomy in commercially insured patients. *JAMA Otolaryngol Head Neck Surg*. Published online January 9, 2020.

doi:10.1001/jamaoto.2019.4193

**eTable 1.** *ICD-9* and *CPT* Codes for Included Cases

**eTable 2.** *ICD-9* and *CPT* Codes for Additional Variables

This supplementary material has been provided by the authors to give readers additional information about their work.

**eTable 1. ICD-9 and CPT Codes for Included Cases**

|                            | <i>ICD-9</i>                                                                                           | <i>CPT</i>                                                                                 |
|----------------------------|--------------------------------------------------------------------------------------------------------|--------------------------------------------------------------------------------------------|
| <b>DIAGNOSIS CODES</b>     |                                                                                                        |                                                                                            |
| Nodule                     | 226, 237.4, 239.7,<br>242.4, 246.1, 246.2,<br>246.9                                                    |                                                                                            |
| Goiter                     | 240.9, 241.0, 241.1,<br>241.9, 242.00, 242.01,<br>242.10, 242.11,<br>242.20, 242.21,<br>242.30, 242.31 |                                                                                            |
| Thyroiditis                | 242.00, 242.01,<br>242.10, 242.11,<br>242.20, 242.21,<br>242.30, 242.31, 242.8,<br>242.9               |                                                                                            |
| Cancer                     | 193                                                                                                    |                                                                                            |
| <b>PROCEDURE CODES</b>     |                                                                                                        |                                                                                            |
| Total thyroidectomy        | 06.4                                                                                                   | 60240, 60252,<br>60254, 60260,<br>60271                                                    |
| Central neck dissection    |                                                                                                        | 60252                                                                                      |
| Lateral neck dissection    | 40.40, 40.41, 40.42,<br>40.3                                                                           | 38700, 38720,<br>38724, 60254                                                              |
| Parathyroid reimplantation | 06.95                                                                                                  | 60512                                                                                      |
| Recurrent nerve repair     | 04.80, 04.89                                                                                           | 31590, 31599,<br>31570, 31571,<br>31560, 64872,<br>64885, 64886,<br>64895, 64896,<br>64910 |

**eTable 2. ICD-9 and CPT Codes for Additional Variables**

|                                   | <b>ICD-9 codes</b>                                                      | <b>CPT/HCPCS codes</b> |
|-----------------------------------|-------------------------------------------------------------------------|------------------------|
| Recurrent laryngeal nerve injury  | 478.3, 478.30, 478.31, 478.32, 478.33, 478.34, 951.8, 31.91             |                        |
| Hypoparathyroidism                | 252.1                                                                   |                        |
| Hypocalcemia                      | 275.4, 275.40, 275.49, 264.40, 275.41, 275.49                           | J0600, J0610           |
| Hungry bone syndrome              | 275.5                                                                   |                        |
| Disorders of magnesium metabolism | 275.2                                                                   | J3475                  |
| Disorders of phosphate metabolism | 275.3                                                                   |                        |
| Vitamin D deficiency              | 268.0, 268.1, 268.2, 268.9                                              | J0636                  |
| Menopause                         | 256.2, 256.31, 256.39, 627.1, 627.2, 627.3, 627.4, 627.8, 627.9, V49.81 |                        |
